# Supplementary material for: Agri-food related social innovations in sustainability transitions: a multiple case study of initiatives across Europe and Northern Africa engaged in change
Source: Springer Nature journal article supplement (doi:10.1007/s10460-025-10742-z), 2025-04-17
Supplement: MOESM1 [file 10460_2025_10742_MOESM1_ESM.docx]

Supplementary Material

Research article*: Agri-food related social innovations in sustainability transitions: a multiple case study of initiatives across Europe and Northern Africa engaged in change*

# Supplementary Tables

**Supplementary Table 1: Coding scheme – deductive main categories. Overview of definitions, applications and examples for the main categories. Structure based on Kuckartz 2018, p. 40, 107.**

| No. | Main Category | Short definition | Application of Category | Example |
| --- | --- | --- | --- | --- |
| 1 | **Organisational form / Affiliation to another organisation** | An initiative or organisation can be (legally) independent or associated to another organisation. An initiative could be a project or a policy development that is run by another organisation or a head organisation. | All information specifying whether the initiative is independent or dependent or connected to another organisation or initiative. | “We are part of the University of [city]” (2IE) |
| 2 | **Financing** | Providing the initiative with capital to carry out its activities and pursue its goals. | All information about how the initiative is financed. | “[..] classic membership fees, but particularly also donations. (3EV) |
| 3 | **Motivation** | “Enthusiasm for doing something.” (Cambridge Advanced Learner's Dictionary & Thesaurus 2023a);  Or “the reasons or intentions that cause a particular set of beliefs or actions.” (Cambridge Advanced Learner's Dictionary & Thesaurus 2023b) | All passages related to the motivation or vision of the initiative to exert activities for a food system transformation and reason for existence of the initiative. These can be intrinsic motivations, environmentally, socially or economically influences but also an unsatisfaction with the current dominant system. | “[..] but also to make a contribution to community or community education in the city, to make artistic, socio-cultural offers.” (3EV) |
| 4 | **Transformative activities** | The actions that differ from the incumbent / dominant ways of doing. The actions of people or organisations that may bring about change. | All information about the activities, actions (*i.e. how*), the initiative exercises to foster a transition towards sustainable food systems in the territorial case, also taking into account social, environmental or economic activities. | “Because we take care that the surplus production, or what can no longer be sold but is useful for consumption, does not go to waste and does not generate any harmful (-) harmful, I mean negative actions for the society, for the economy.” (1FB) |
| 5 | **Challenges and obstacles** | Challenge: “A job, duty, or situation that is difficult because you must use a lot of effort, determination, and skill in order to be successful.” (Cambridge Business English Dictionary 2023);  Obstacle: “Something that blocks you so that movement, going forward, or action is prevented or made more difficult.” (Cambridge Advanced Learner's Dictionary & Thesaurus 2023c) | All passages that are related to circumstances, reasons or aspects that are hindering, impeding or interfering the initiatives’ activities and their aims. These aspects are most likely negatively connotated but not limited to negative facets. | “And if we are to reduce animal consumption, we will do so by increased imports. Because if we have to fill up the plate next to the meat with all sorts of other things all year round, then we cannot grow it in Denmark.” (7GW) |
| 6 | **Current supportive factors / favourable conditions** | Current help or encouragement given to someone. (Cambridge Essential Dictionary 2023) | All passages about current supportive conditions that are favourable for the development of the initiative. | “[..] there is support from volunteers who give us a hand, also from the EU, a small fee from members.” (10SQ) |

**Supplementary Table 2: Coding scheme – inductive sub-categories. Overview of definitions, applications and examples for the sub-categories. Structure based on Kuckartz 2018, p. 40, 107.**

| Main category | Sub-category (1st order) | Short definition and / or application | Example |
| --- | --- | --- | --- |
| Motivation | Intrinsic motivation | Motive, reason for acting in a certain way, motivation that comes from the inside of a person / organisation and not from the outside, also in an altruistic way. | “We do this primarily for ourselves. Because we enjoy it.” (2IE) |
| Socially driven | All motivations that are related to human society, the interaction of the individual and the group, or the welfare of human beings as members of society. | “Of course, primarily with the task of supporting or enabling teaching and research, as well as teaching and research for organic farming (2IE) |
| Environmental aspects | All aspects that are related to nature, the ecosystem or biodiversity, nature conservation and protection and aspects that promote a sustainable development on regional, national or international level. | “[..] promotion of a diverse local food production here in [*city*], enrichment with the city with fruit trees, increase of the local self-sufficiency share with vegetables, that is plant products, development of areas for sustainable production, development of usage structures for care, harvesting and distribution.” (3EV) |
| Unsatisfaction with current system | Dissatisfied with the current way of doing things, with the dominant or incumbent system (i.e. food system). | “[..] that conventional structures and processes, behaviors, but also measures are called into question” (1AN) |
| Economic motives or given tasks | Financial, profitable or cost-efficient reasons. The reasons to keep the organisation running or ensure continuity of the organisation. Or an order or mission from another instance to fulfil certain tasks. | “We, on the other hand, have the role or responsibility for the overall implementation of the (municipal) “food and meal strategy”.” (2HF) |
| Transformative activities | Actor (Stakeholder) interaction | All activities that include an interaction with other actors or stakeholders (stakeholders=directly or indirectly involved in the initiative and are interested in their activities), i.e. networking, collaboration, cooperation including the different domains the initiative collaborates, networks, cooperates with (i.e. research, politics, other initiatives and businesses). | “We have had a research collaboration with university [..]” (2HF) |
| Consultancy | Giving other people / organisations advice or guidance. | “[..] and in cooperation with civil society and initiatives and also advises municipalities.” (1AN) |
| Research | A detailed study or analysis of something in order to discover new information or understandings. | “Nevertheless, we are also doing research, for example within organic farming, on how it can, for example, be more nature conservation compliant, endanger fewer species (2IE) |
| Education | Teaching and passing on or sharing knowledge, information and convey understanding on specific aspects to interested people or organisations. | “[..] the possibility to share climate-friendly dishes in the app for the others, [..].” (1AN) |
| Experimentation | Finding out what works best, trying out new concepts. Providing spaces for experimentation but also experimentation by initiatives themselves., for instance, interaction with people in trying out other ways of food growing, living; create a place for experimentation for interested people. | “[..] finding out what works and what doesn’t work for for my kindergarten children in my kitchen, what what yes (-). What is like the new favorite dishes and what what is just totally a “no go”.” (2HF) |
| Social and cultural activities | All activities that are dedicated to other people in order to help or support people in need or the organisation and conduct of cultural events where people can participate. This category does not apply to educational activities or experimentation where other people are involved. | “[..] we engage in helping people in the crisis of homelessness.” (1FB) |
| Consumer | “A person who buys goods or services on their own use.” (Cambridge Advanced Learner's Dictionary & Thesaurus 2023d).  All passages that refer to activities with consumers, for instance, changing consumer habits, taking up consumer demands or raising consumer’s awareness but not educational activities or experimentation with consumers. | “[..]one is that we want to get to know the opinion, opinions and proposals of [*city*]’s residents on this subject.” (6SP) |
| Regional development | All activities that are linked to the area, the surrounding or the region where the initiative is situated, for instance, fostering cities’ ability to adapt to changing climate conditions; selling regional products, increase consumption of local products, regional agriculture; Increase of self-sufficiency share. | “So not only produce food and do research, but also anchor and network in the region, promote ecological building and sustainable energy management.” (2IE) |
| Environment | All activities that are related to nature, the ecosystem or biodiversity, for instance, reduction of greenhouse gas emissions, protection of nature. | “[..] uses something called Cool Food Pledge which is the World Resources Institute's calculator. And it is such a thing, what can I say, it is not in an extreme but but also takes into account, for example, the consequences of relocated (-) so of land use, and transport which is a relatively small part unless we are talking airplane right. But it’s the fewest raw materials that are transported by air.” (2HF) |
| Politics | All aspects related to the governance of a community or state, for instance, policy development or policy implementation (on regional, national, municipality level). | “We, on the other hand, have the role or responsibility for the overall implementation of the (municipal) “food and meal strategy”.” (2HF) |
| Foods and diets | All activities related to organic food and agriculture, sustainable and healthy diets or reduction of food waste. | “so ecology *[means organic]* and then food quality, so taste and good ingredients and such and food from scratch, the two tracks have been parallel (the two pillars, food quality and ecology, have been parallel). And it is very much about that with the organic transition we have quit, of course step by step, but all processed products.” (2HF) |
| Challenges and obstacles | Finance and funding | The money provided by other people / organisations, the money the organisation / initiative receives for their products / activities / services. Potential challenges in this domain may be bureaucracy or receiving follow-up funds (for the implementation of aspects developed during the actual funding period), but also hiring employees. | “[..]in principle the funding system is (-) well, there is just little (-) or little money for a short time. And stabilisation is not financed, but everything must always be innovative and implemented with little money and as quickly as possible.” (1AN) |
| Politics, laws, regulations, legal structure of initiative | All aspects related to the governance of a community or state, for instance, policies or regulations (on regional, national, municipality level) that are hindering the initiative’s development / activities.  The juridical structure of the organisation / initiative, for instance, if the initiative is highly dependent on the parent company / organisation. | “[..] tight corset of employment law or employment law requirements of the university.” (2IE) |
| Food and agriculture | All challenges and obstacles that are directly related to food and agricultural topics, for instance, availability of plant-based and local foods throughout the year; costs of more sustainably produced products; duration of soil reorganisation; food culture (e.g. consumer habits regarding meat consumption, stereotypes and expectations). | “we can't as a municipality decide what individual kitchens buy of food. So we can set the framework for it and and we have a really high, like compliance like in relation to our purchasing agreement being used, but but we can’t control in detail that the nursery “Butter Patch” should buy more plant protein and less meat. So, what can we say, the power is also in the kitchens.” (2HF) |
| Current economic practices and established infrastructures | The dominant and incumbent ways of doing related to economy and the already constructed / built up and used infrastructures.  Infrastructure: All facilities, institutions, structures, systems (material) and non-material realities that serve the services of general interest and the economic structure of a state or its regions. | “ [..]current economic practices [..]” (1AN) |
| Spatial / Territorial aspects | All factors linked to the area, the surrounding or the region where the initiative is situated, for instance, lack of urban space; competition with similar initiatives; negative reputation of similar initiatives. | “And if we are to reduce animal consumption, we will do so by increased imports. Because if we have to fill up the plate next to the meat with all sorts of other things all year round, then we cannot grow it in Denmark.” (7GW) |
| Covid 19 | The global coronavirus pandemic. | “At the moment it is simply difficult to get appointments with the city, because they are still busy with "C" [*covid-19]*.” (3EV) |
| Current supportive factors / favourable conditions | Financing | All activities that support the organisation financially, i.e. donations, sponsoring, member fees, funding programs. | “[..] the agricultural turnaround with everything that goes with it, from which the federal program for organic farming has emerged, which has enormous money, so compared to other research areas it is ridiculous, but compared to what existed before, this has already released large amounts of research funds.” (2IE) |
| Politics and policies towards sustainable development | The policies and politics on regional (municipality, councillor), international or national level that are directed to promote a development that “meets the needs of the present without compromising the ability of future generations to meet their own needs." (UN 1987) | “[..] the agricultural turnaround with everything that goes with it, from which the federal program for organic farming has emerged, which has enormous money, so compared to other research areas it is ridiculous, but compared to what existed before, this has already released large amounts of research funds.” (2IE) |
| Initiatives’ legal structure | The juridical structure of the organisation / initiative. | “[..] proximity to the university is natural, we have a very large customer base, as far as our farm shop, our direct marketing is concerned from the university.” (2IE) |
| Territorial area and regional characteristics | All supportive factors linked to the area, the surrounding or the region where the initiative is situated, including climate conditions or changing climate. | “[*region*] already has a good climate for organic farming.” (2IE) |
| Actors | The interplay, communication or connection to actors, consumers or stakeholders or the network of actors that are mentioned to be supportive for the development of the initiative as well as the specific groups of actors or stakeholders that are perceived as supportive (e.g. members, participants, volunteers, politicians, organisations or similar initiatives) and the actors that are putting pressure on the initiative to exert more sustainable activities. Additionally, also the results from collaborations (e.g. research results). An example for this category is also the moral support by actors or the raising awareness of consumers concerning environmental issues and their resulting demand for actions. | “[..] research results are generated that also help us, but has definitely promoted and advanced research for organic farming and has also made many new projects and approaches possible. Also like this agroforestry project, which is coming now.” (2IE) |

**References:**

Cambridge Business English Dictionary (2023). Challenge, noun. Cambridge University Press. (Accessed 30.03.23) Available at

<https://dictionary.cambridge.org/dictionary/english/challenge>.

Cambridge Advanced Learner's Dictionary & Thesaurus (2023a). Motivation, noun. Cambridge University Press. (Accessed 30.03.23) Available at <https://dictionary.cambridge.org/dictionary/english/motivation>.

Cambridge Advanced Learner's Dictionary & Thesaurus (2023b). Rationale, noun. Cambridge University Press. (Accessed 30.03.23) Available at <https://dictionary.cambridge.org/dictionary/english/rationale>.

Cambridge Advanced Learner's Dictionary & Thesaurus (2023c). Obstacle, noun. Cambridge University Press. (Accessed 30.03.23) Available at <https://dictionary.cambridge.org/dictionary/english/obstacle>.

Cambridge Essential Dictionary (2023). Support, noun. Cambridge University Press. (Accessed 30.03.23) Available at <https://dictionary.cambridge.org/dictionary/essential-british-english/support>

FAO (2018). Sustainable food systems: Concept and framework. Rome.

UN (United Nations) (1987). Our Common Future. (Accessed 03.04.23) Available at <https://sustainabledevelopment.un.org/content/documents/5987our-common-future.pdf>
